# Supplementary material
Source: MDPI journal article supplement (https://www.mdpi.com/2624-781X/3/4/39)
Supplement: s1 [file s1]

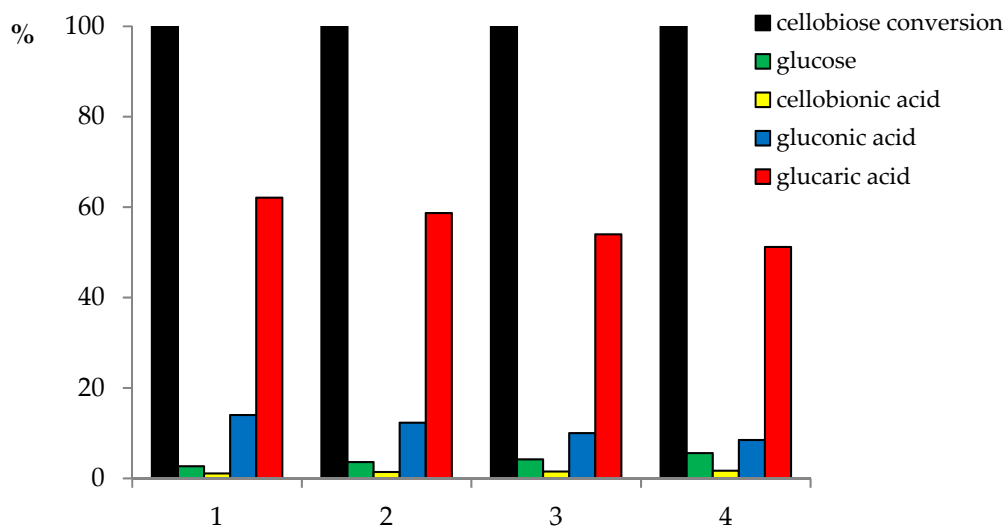

**Figure S1.** Cellobiose conversion and yield of main products upon repeated use of the catalyst (cellobiose 0.2 g; 3 % Pt/HPS MN270 0.05 g; H<sub>2</sub>O 20 mL; 145 °C; O<sub>2</sub> 5 bar, 2 h).

**Table S1.** The results of the study of the initial sample of the catalyst and the catalyst after four cycles of use.

| Sample                     | BET                                   | Langmuir                            | t-plot                                                 |                           |
|----------------------------|---------------------------------------|-------------------------------------|--------------------------------------------------------|---------------------------|
|                            | $S_{\text{BET}}, \text{m}^2/\text{g}$ | $S_{\text{L}}, \text{m}^2/\text{g}$ | $S_{\text{t}}, \text{m}^2/\text{g}$                    | $V, \text{cm}^3/\text{g}$ |
| 3 % Pt/HPS MN270 (initial) | 863                                   | 944                                 | 184 <sup>1</sup> , 678 <sup>2</sup> , 862 <sup>3</sup> | 0.31                      |
| 3 % Pt/HPS MN270 (used)    | 324                                   | 345                                 | 99 <sup>1</sup> , 224 <sup>2</sup> , 323 <sup>3</sup>  | 0.10                      |

<sup>1</sup> - specific surface area surface of meso and macropores; <sup>2</sup> - specific surface area of micropores; <sup>3</sup> - is the total specific surface area;  $S_{\text{L}}$  - specific surface area (Langmuir model);  $S_{\text{BET}}$  - specific surface area (BET model);  $S_{\text{t}}$  - specific surface area (t-plot);  $V$  is the volume of micropores.

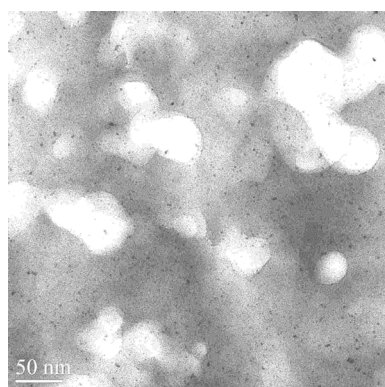

(a)

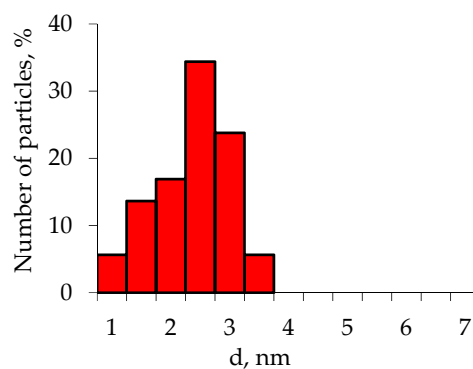

(b)

**Figure S2.** TEM images of used 3 % Pt/HPS MN270 catalyst sample (a) and size distribution diagrams of Pt-containing nanoparticles (b).
